# Supplementary material
Source: PubMed Central journal article supplement (PMC5953396)
Supplement: tpmd180017.SD1.pdf [file tpmd180017.SD1.pdf]

### Nationally recognized liberal arts colleges (LACs)

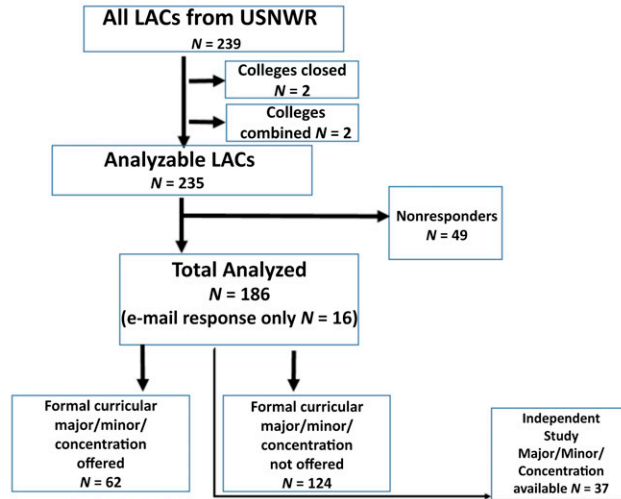

SUPPLEMENTAL FIGURE 1. Liberal arts undergraduate colleges examined by e-survey and validation subset.

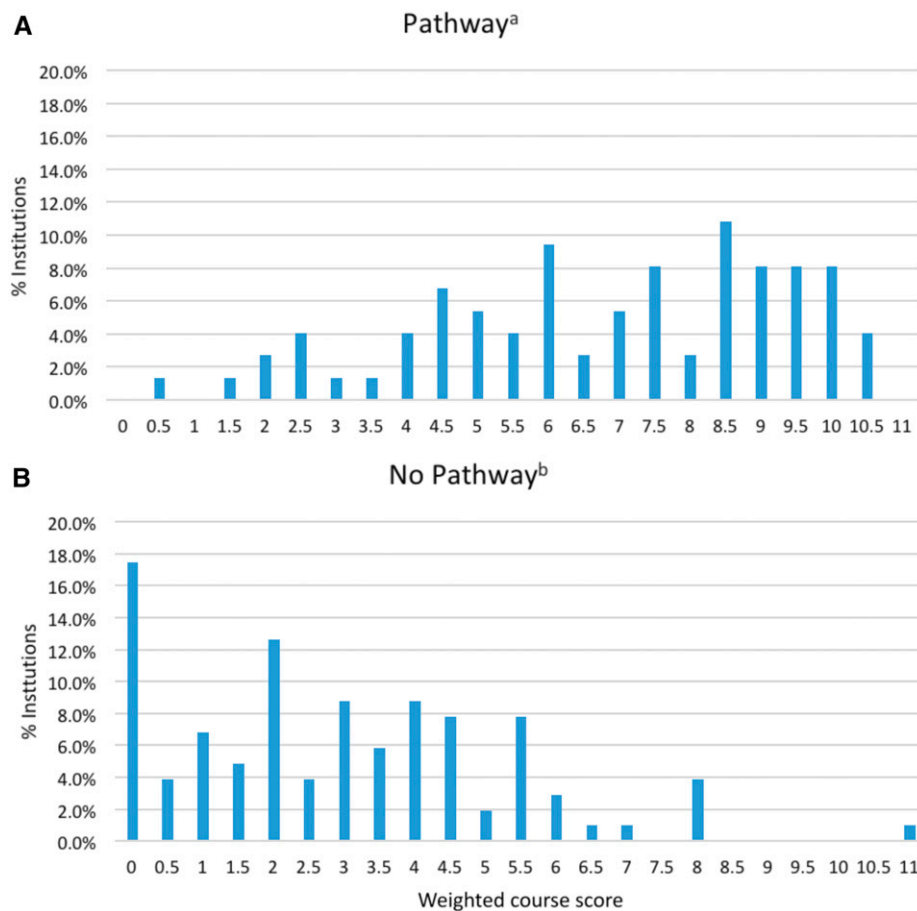

SUPPLEMENTAL FIGURE 2. Distribution density of weighted course scores for schools ranked by *US News and World Report* and reporting on curriculum.

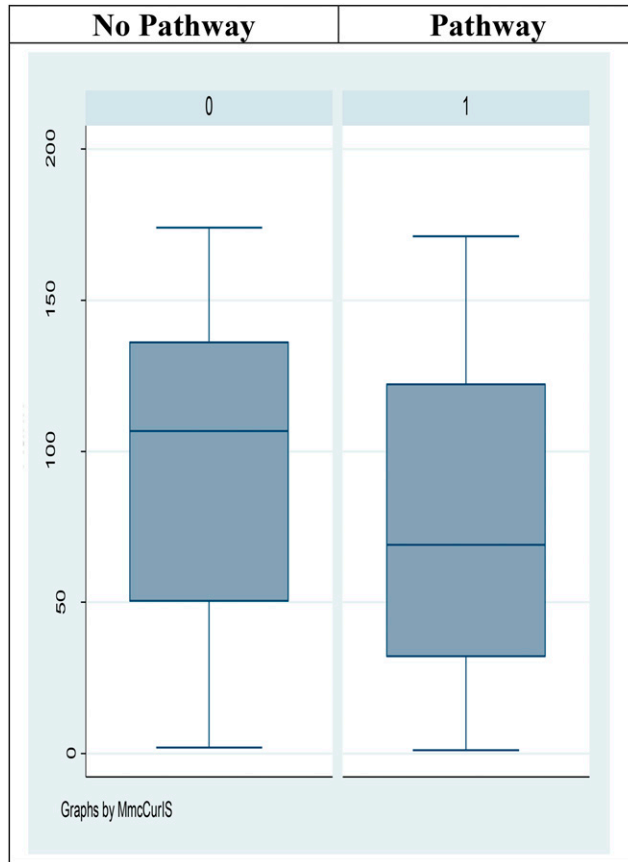

SUPPLEMENTAL FIGURE 3. Boxplot of rank among ranked institutions with a curricular pathway to PH/GH ( $N = 70$ ) vs. No Pathway ( $N = 76$ ).

SUPPLEMENTAL TABLE 1  
Frequency of public health class offering by type of college curriculum and ISs offerings

| Offerings available at college*                | Major†    | Minor†     | Concentration† | Major or minor or concentration‡§ | Major or minor or concentration or IS‡§ | No major or minor or concentration or IS offered |
|------------------------------------------------|-----------|------------|----------------|-----------------------------------|-----------------------------------------|--------------------------------------------------|
|                                                | Pathway   |            |                |                                   |                                         | No Pathway                                       |
| Colleges in group (N)                          | 26        | 37         | 14             | 56                                | 74                                      | 103                                              |
|                                                | N (%)     | N (%)      | N (%)          | N (%)                             | N (%)                                   | N (%)                                            |
| <b>Classes offered</b>                         |           |            |                |                                   |                                         |                                                  |
| Intro to public health¶                        | 17 (65.4) | 27 (73.0)  | 9# (69.2)      | 38# (69.1)                        | 47# (64.4)                              | 18# (17.8)                                       |
| Epidemiology¶                                  | 21 (80.8) | 29 (78.4)  | 10 (71.4)      | 43 (76.8)                         | 50 (67.6)                               | 18 (17.5)                                        |
| Global health¶                                 | 19 (73.1) | 30 (81.1)  | 10 (71.4)      | 42 (75.0)                         | 51 (68.9)                               | 17 (16.5)                                        |
| Statistics (intro, bio or medical)¶            | 24 (92.3) | 36 (97.3)  | 14 (100.0)     | 54 (96.4)                         | 72 (97.3)                               | 75 (72.8)                                        |
| Environmental health¶                          | 18 (69.2) | 23 (62.2)  | 8 (57.1)       | 34 (60.7)                         | 42 (56.8)                               | 15 (14.6)                                        |
| Health policy¶                                 | 15 (57.7) | 22 (59.5)  | 9 (64.3)       | 32 (57.1)                         | 39 (52.7)                               | 20 (19.4)                                        |
| Health economics¶                              | 11 (42.3) | 25 (67.6)  | 8 (57.1)       | 34 (60.7)                         | 39 (52.7)                               | 24 (23.3)                                        |
| Bioethics                                      | 20 (76.9) | 32 (86.5)  | 12 (85.7)      | 45 (80.4)                         | 57 (77.0)                               | 54 (52.4)                                        |
| Maternal-child health                          | 5 (19.2)  | 6 (16.2)   | 8 (57.1)       | 14 (25.0)                         | 16 (21.6)                               | 8 (7.8)                                          |
| Food systems or security                       | 9 (34.6)  | 14 (37.8)  | 7 (50.0)       | 23 (41.1)                         | 31 (41.9)                               | 22 (21.4)                                        |
| Medical anthropology                           | 8 (30.8)  | 19 (51.4)  | 8 (57.1)       | 28 (50.0)                         | 36 (48.6)                               | 26 (25.2)                                        |
| Medical sociology                              | 15 (57.7) | 24 (64.9)  | 9 (64.3)       | 37 (66.1)                         | 43 (58.1)                               | 42 (40.8)                                        |
| Social or community psychology                 | 19 (73.1) | 24 (64.9)  | 12 (85.7)      | 40 (71.4)                         | 48 (64.9)                               | 39 (37.9)                                        |
| Internship in public health (or related)       | 23 (88.5) | 32 (86.5)  | 8 (57.1)       | 45 (80.4)                         | 52 (70.3)                               | 27 (26.2)                                        |
| Capstone project in public health (or related) | 22 (84.6) | 26# (72.2) | 8 (57.1)       | 39# (70.9)                        | 48# (65.8)                              | 10 (9.7)                                         |
| Weighted course scores mean (SD)               | 7.1 (2.5) | 7.6 (2.2)  | 7.4 (2.9)      | 7.4 (2.4)                         | 6.8 (2.5)                               | 2.9 (2.3)                                        |

IS = independent study; SD = standard deviation.

\* One hundred and seventy-seven of 186 survey responding colleges provided information on course offerings. The nine colleges that provided no course information are excluded from this table; all reported absence of formal curriculum pathways for PH/GH.

† Only those offered as part of a formal curriculum.

‡ Groups are concatenated.

§ Includes offering of IS-based majors, minors, and concentrations.

|| Only those colleges that offer no public/global health majors, minors, or concentrations through either formal curriculum offerings or IS.

¶ Considered "core" Public/Global Health courses, based on Gebro's definition of "core" (Gebro et al.<sup>11</sup>), plus the inclusion of Introduction to Public Health and Global Health.

# Number of missing responses is excluded from several proportion calculations.

SUPPLEMENTAL TABLE 2  
Frequency of LACs reporting active pursuit or discussion of public health programs or additions

| Presently with... | Pursuing PH programs or additions* (%) |         |       |        |
|-------------------|----------------------------------------|---------|-------|--------|
|                   | Pursuing                               | Discuss | None  | Total  |
| No Pathway        | 3                                      | 13      | 72    | 88     |
|                   | 3.41                                   | 14.77   | 81.82 | 100.00 |
| Pathway           | 16                                     | 24      | 31    | 71     |
|                   | 22.54                                  | 33.80   | 43.66 | 100.00 |
| Total             | 19                                     | 37      | 103   | 159    |
|                   | 11.95                                  | 23.27   | 64.78 | 100.00 |

LACs = liberal arts colleges.

\* One hundred and fifty-nine of 186 survey responding colleges provided information.
